# Supplementary material for: Associations between childhood and adulthood socioeconomic position and grip strength at age 46 years: findings from the 1970 British Cohort Study
Source: Springer Nature journal article supplement (doi:10.1186/s12889-022-13804-7), 2022-07-27
Supplement: MOESM1 [file 23310106]

**Appendix Material for Online Publication: Associations between socioeconomic position across life and grip strength at age 46 years: findings from the 1970 British Cohort Study**  
Mohamed Yusuf, Gallin Montgomery, Mark Hamer, Jamie McPhee, Rachel Cooper

**Figure S1:** Pathway diagram detailing the illustrates the proposed pathways of association

**Table S1:** Variables used in multiple imputation

**Table S2:** A comparison of the distributions of variables included in the multiple imputation models by completeness of data

**Table S3:** Associations between indicators of childhood socioeconomic position and grip strength at age 46 years in the BCS70 (linear regression models in A) Females (n=3,922) and B) Males (n=3,695))

**Table S4:** Associations between indicators of adulthood socioeconomic position and grip strength at age 46 years in the BCS70 (linear regression models in A) Females (n=3,922) and B) Males (n=3,695))

**Table S5:** Associations between adulthood socioeconomic position and grip strength at age 46 years in the BCS70 with individual adjustments for each adult covariate (linear regression models in Males (n=3,695))

**Table S6:** Unadjusted associations between indicators of childhood and adulthood socioeconomic position and grip strength at age 46 years in the BCS70 on observed data (linear regression models in A) Females (n=3,922) and B) Males (n=3,695))

**Table S7:** Associations between indicators of childhood and adulthood socioeconomic position and grip strength at age 46 years in the BCS70 on the sample who completed the grip strength assessment standing unsupported (linear regression models in A) Females (n=3,498) and B) Males (n=3,392))  
*[Sensitivity analysis]*

**Table S8:** Associations between indicators of childhood and adulthood socioeconomic position and grip strength at age 46 in the BCS70 excluding those participants unable to complete the grip strength assessments for health reasons (linear regression models in A) Females (n=3,872) and B) Males (n=3,675)) *[Sensitivity analysis]*

**Table S9:** Associations between indicators childhood and adulthood socioeconomic position and grip strength at age 46 in the BCS70 excluding those participants classified as severely hampered according to the European Statistics of Income and Living Conditions (EU-SILC) classification disability definition or with missing disability data (linear regression models in A) Females (n=3,638) and B) Males (n=3,394)) *[Sensitivity analysis]*

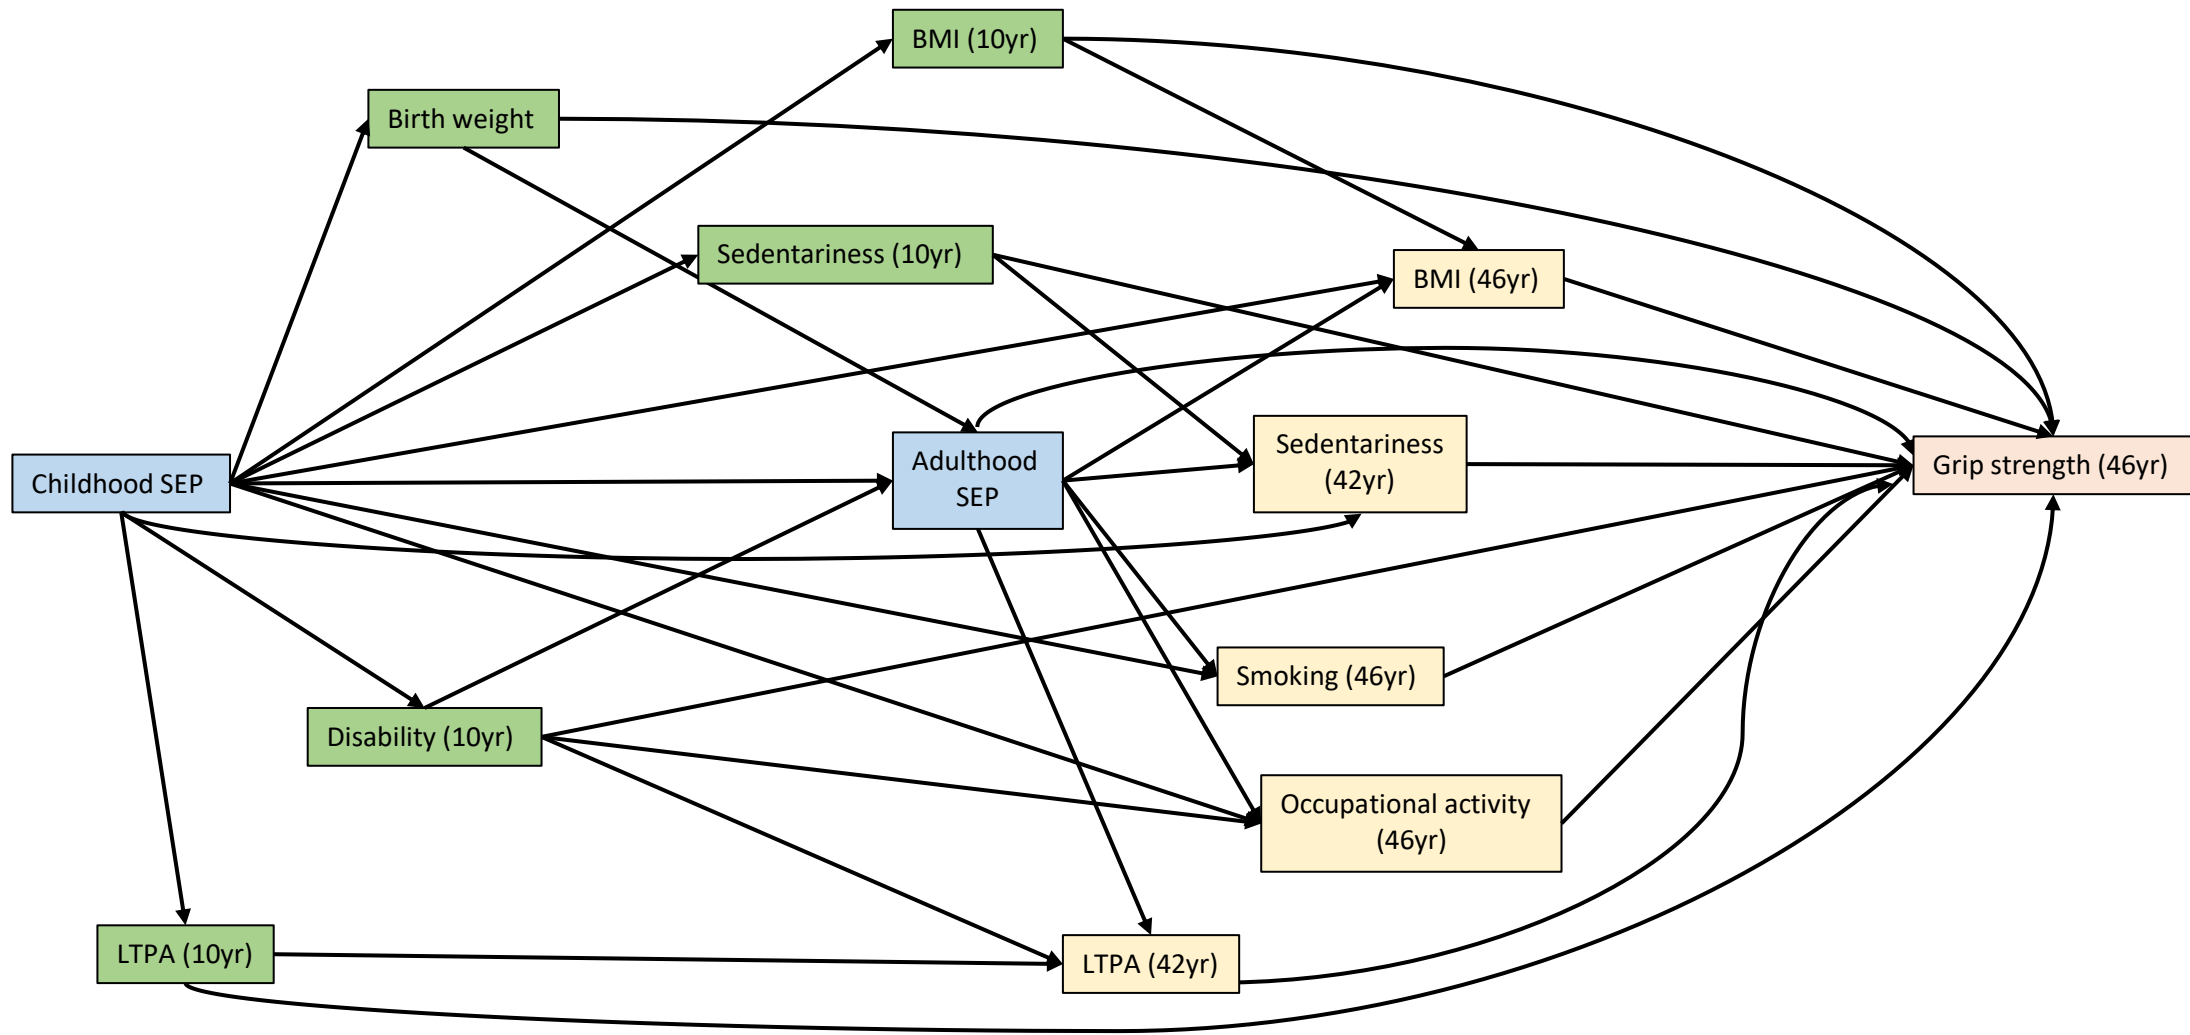

**Figure S1:** Pathway diagram detailing the proposed pathways of associations. For the relationships between indicators of childhood SEP and grip strength (age 46y), adulthood SEP and all the covariates in the green and yellow boxes are treated as potential mediators. For the relationships between indicators of adulthood SEP and grip strength, childhood SEP and the covariates in the green boxes are treated as potential confounders, while the covariates in the yellow boxes are treated as potential mediators.

**Table S1: Variables used in multiple imputation**

| Variable                                  | Type of variable | Method used to predict missing data for this variable | N (%)* with observed data on this variable |
|-------------------------------------------|------------------|-------------------------------------------------------|--------------------------------------------|
| <b>Exposure variable</b>                  |                  |                                                       |                                            |
| Father's occupational class at age 5y     | Ordinal          | Ordered logistic regression                           | 7,198 (94.5%)                              |
| Mother's highest qualification at age 5y  | Ordinal          | Ordered logistic regression                           | 5,931 (77.9%)                              |
| Father's highest qualification at age 5y  | Ordinal          | Ordered logistic regression                           | 5,565 (73.1%)                              |
| Own occupational class at age 46y         | Ordinal          | Ordered logistic regression                           | 6,404 (84.1%)                              |
| Own highest qualification at age 46y      | Ordinal          | Ordered logistic regression                           | 7,512 (98.6%)                              |
| <b>Covariates</b>                         |                  |                                                       |                                            |
| Birth weight                              | Continuous       | Predictive mean matching                              | 7,046 (92.5%)                              |
| Body Mass Index at age 10y                | Continuous       | Predictive mean matching                              | 6,016 (79.0%)                              |
| Leisure-time physical activity at age 10y | Ordinal          | Ordered logistic regression                           | 6,607 (86.7%)                              |
| Sedentary behaviour at age 10y            | Ordinal          | Ordered logistic regression                           | 6,626 (87.0%)                              |
| Disability at age 10y                     | Ordinal          | Ordered logistic regression                           | 6,606 (86.7%)                              |
| Height at age 46y                         | Continuous       | Predictive mean matching                              | 7,553 (99.2%)                              |
| Body Mass Index at age 46y                | Continuous       | Predictive mean matching                              | 7,387 (97.0%)                              |
| Smoking at age 42y                        | Ordinal          | Ordered logistic regression                           | 7,111 (93.4%)                              |
| Sedentary behaviour at age 42y            | Ordinal          | Ordered logistic regression                           | 6,368 (83.6%)                              |
| Leisure-time physical activity at age 42y | Ordinal          | Ordered logistic regression                           | 7,008 (92.0%)                              |
| Occupational activity at age 46y          | Ordinal          | Ordered logistic regression                           | 6,291 (82.6%)                              |
| <b>Auxiliary variables</b>                |                  |                                                       |                                            |
| Father's age at completion of education   | Continuous       | Predictive mean matching                              | 6,781 (89.0%)                              |
| Mother's age at completion of education   | Continuous       | Predictive mean matching                              | 7,007 (92.0%)                              |
| Mother's age at birth                     | Continuous       | Predictive mean matching                              | 7,012 (92.1%)                              |
| Mother's marital status at birth          | Ordinal          | Ordered logistic regression                           | 7,045 (92.5%)                              |
| Number of older siblings at birth         | Continuous       | Predictive mean matching                              | 7,052 (92.6%)                              |
| Father's occupational class at age 16y    | Ordinal          | Ordered logistic regression                           | 6,798 (89.2%)                              |

\* For the percentage reported, the numerator is the observed data divided by the denominator (total analytic sample size: n=7,617)

**Table S2: A comparison of the distributions of variables included in the multiple imputation models by completeness of data**

| Characteristics                                 | Mean (SD) or N (%) <sup>a</sup> |                                           |                                           | p-value <sup>d</sup> |
|-------------------------------------------------|---------------------------------|-------------------------------------------|-------------------------------------------|----------------------|
|                                                 | Total N <sup>a</sup>            | No missing data <sup>b</sup><br>(N=3,075) | Incomplete data <sup>c</sup><br>(N=4,542) |                      |
| <b>Exposure variables</b>                       |                                 |                                           |                                           |                      |
| Father's occupational class at age 5y           | 7,198                           |                                           |                                           | <0.001               |
| <i>I Professional/II Intermediate</i>           |                                 | 1,040 (33.8)                              | 1,058 (25.7)                              |                      |
| <i>III Skilled non-manual</i>                   |                                 | 306 (10.0)                                | 483 (11.7)                                |                      |
| <i>III Skilled manual</i>                       |                                 | 1,301 (42.3)                              | 1,762 (42.7)                              |                      |
| <i>IV Partly skilled/V Unskilled</i>            |                                 | 428 (13.9)                                | 820 (19.9)                                |                      |
| Mother's highest qualification at age 5y        | 5,931                           |                                           |                                           | 0.007                |
| <i>Higher vocational/degree and higher</i>      |                                 | 322 (10.5)                                | 243 (8.5)                                 |                      |
| <i>A-level/equivalent</i>                       |                                 | 146 (4.7)                                 | 126 (4.4)                                 |                      |
| <i>Vocational/O-level/equivalent</i>            |                                 | 1,116 (36.3)                              | 989 (34.6)                                |                      |
| <i>No qualification</i>                         |                                 | 1,491 (48.5)                              | 1,498 (52.5)                              |                      |
| Father's highest qualification at age 5y        | 5,565                           |                                           |                                           | 0.009                |
| <i>Higher vocational/degree and higher</i>      |                                 | 600 (19.5)                                | 432 (17.3)                                |                      |
| <i>A-level/equivalent</i>                       |                                 | 278 (9.0)                                 | 196 (7.9)                                 |                      |
| <i>Vocational/O-level/equivalent</i>            |                                 | 915 (29.8)                                | 719 (28.9)                                |                      |
| <i>No qualification</i>                         |                                 | 1,282 (41.7)                              | 1,143 (45.9)                              |                      |
| Own occupational class at age 46y               | 6,404                           |                                           |                                           | <0.001               |
| <i>I Professional/II Intermediate</i>           |                                 | 1,510 (49.1)                              | 1,514 (45.5)                              |                      |
| <i>III Skilled non-manual</i>                   |                                 | 724 (23.5)                                | 742 (22.3)                                |                      |
| <i>III Skilled manual</i>                       |                                 | 572 (18.6)                                | 713 (21.4)                                |                      |
| <i>IV Partly skilled/V Unskilled</i>            |                                 | 269 (8.7)                                 | 360 (10.8)                                |                      |
| Own highest qualification at age 46y            | 7,512                           |                                           |                                           | <0.001               |
| <i>Degree and higher</i>                        |                                 | 915 (29.8)                                | 1,063 (24.0)                              |                      |
| <i>A-level and vocational qualification</i>     |                                 | 490 (15.9)                                | 585 (13.2)                                |                      |
| <i>GCSEs</i>                                    |                                 | 976 (31.7)                                | 1,386 (31.2)                              |                      |
| <i>No qualification</i>                         |                                 | 694 (22.6)                                | 1,403 (31.6)                              |                      |
| <b>Covariates</b>                               |                                 |                                           |                                           |                      |
| Birth weight (kg) (Mean (SD))                   | 7,046                           | 3.34 (0.5)                                | 3.29 (0.5)                                | <0.001               |
| BMI (kg/m <sup>2</sup> ) at age 10y (Mean (SD)) | 6,016                           | 16.78 (2.0)                               | 16.89 (2.1)                               | 0.044                |
| Leisure-time physical activity at age 10y       | 6,607                           |                                           |                                           | 0.400                |
| <i>Never or hardly ever</i>                     |                                 | 228 (7.4)                                 | 295 (8.4)                                 |                      |
| <i>Sometimes</i>                                |                                 | 1,201 (39.1)                              | 1,362 (38.6)                              |                      |
| <i>Often</i>                                    |                                 | 1,646 (53.5)                              | 1,875 (53.1)                              |                      |

| Characteristics                                       | Total N <sup>a</sup> | Mean (SD) or N (%) <sup>a</sup>           |                                           | p-value <sup>d</sup> |
|-------------------------------------------------------|----------------------|-------------------------------------------|-------------------------------------------|----------------------|
|                                                       |                      | No missing data <sup>b</sup><br>(N=3,075) | Incomplete data <sup>c</sup><br>(N=4,542) |                      |
| Sedentary behaviour (TV watching) at age 10y          | 6,626                |                                           |                                           | 0.900                |
| <i>Never or hardly ever</i>                           |                      | 33 (1.1)                                  | 42 (1.2)                                  |                      |
| <i>Sometimes</i>                                      |                      | 608 (19.8)                                | 714 (20.1)                                |                      |
| <i>Often</i>                                          |                      | 2,434 (79.2)                              | 2,795 (78.7)                              |                      |
| Disability at age 10y                                 | 6,606                |                                           |                                           | 0.031                |
| <i>No</i>                                             |                      | 2,887 (93.9)                              | 3,259 (92.3)                              |                      |
| <i>Yes, slight</i>                                    |                      | 175 (5.7)                                 | 248 (7.0)                                 |                      |
| <i>Yes, severe</i>                                    |                      | 13 (0.4)                                  | 24 (0.7)                                  |                      |
| Height (m) at age 46y (Mean (SD))                     | 7,553                | 1.71 (0.09)                               | 1.69 (0.09)                               | 0.002                |
| BMI (kg/m <sup>2</sup> ) at age 46y (Mean (SD))       | 7,387                | 28.24 (5.3)                               | 28.56 (5.6)                               | 0.013                |
| Smoking status at age 42y                             | 7,111                |                                           |                                           | <0.001               |
| <i>Never smoker</i>                                   |                      | 1,568 (51.0)                              | 1,798 (44.5)                              |                      |
| <i>Ex-smoker</i>                                      |                      | 900 (29.3)                                | 1,177 (29.2)                              |                      |
| <i>Current smoker (less than daily)</i>               |                      | 175 (5.7)                                 | 218 (5.4)                                 |                      |
| <i>Current smoker (daily)</i>                         |                      | 432 (14.0)                                | 843 (20.9)                                |                      |
| Sedentary behaviour (TV watching) at age 42y          | 6,368                |                                           |                                           | <0.001               |
| <i>0 to &lt;1 hour</i>                                |                      | 481 (17.2)                                | 590 (16.5)                                |                      |
| <i>1 to &lt;3 hours</i>                               |                      | 1,718 (61.5)                              | 2,048 (57.3)                              |                      |
| <i>3 to &lt;5 hours</i>                               |                      | 477 (17.1)                                | 699 (19.6)                                |                      |
| <i>5+ hours</i>                                       |                      | 117 (4.2)                                 | 238 (6.7)                                 |                      |
| Leisure-time physical activity (days/week) at age 42y | 7,008                |                                           |                                           | <0.001               |
| <i>0 days</i>                                         |                      | 761 (24.7)                                | 1,183 (30.1)                              |                      |
| <i>1 day per a week</i>                               |                      | 380 (12.4)                                | 448 (11.4)                                |                      |
| <i>2 days per a week</i>                              |                      | 503 (16.4)                                | 539 (13.7)                                |                      |
| <i>3 days per a week</i>                              |                      | 477 (15.5)                                | 563 (14.3)                                |                      |
| <i>4/5 days per a week</i>                            |                      | 557 (18.1)                                | 653 (16.6)                                |                      |
| <i>6/7 days per a week</i>                            |                      | 397 (12.9)                                | 547 (13.9)                                |                      |
| Occupational activity at age 46y                      | 6,291                |                                           |                                           | 0.050                |
| <i>Sitting occupation</i>                             |                      | 1,735 (56.4)                              | 1,703 (53.0)                              |                      |
| <i>Standing occupation</i>                            |                      | 460 (15.0)                                | 512 (15.9)                                |                      |
| <i>Physical work</i>                                  |                      | 743 (24.2)                                | 840 (26.1)                                |                      |
| <i>Heavy manual work</i>                              |                      | 137 (4.5)                                 | 161 (5.0)                                 |                      |
| <b>Auxiliary variables</b>                            |                      |                                           |                                           |                      |
| Father's age (y) at completion of education           | 6,781                | 16.36 (4.2)                               | 16.22 (4.8)                               | 0.200                |
| Mother's age (y) at completion of education           | 7,007                | 15.99 (3.2)                               | 15.88 (4.4)                               | 0.200                |
| Mother's age at birth (y)                             | 7,012                | 26.21 (5.3)                               | 25.88 (5.4)                               | 0.010                |

| Characteristics                        | Total N <sup>a</sup> | Mean (SD) or N (%) <sup>a</sup>           |                                           | p-value <sup>d</sup> |
|----------------------------------------|----------------------|-------------------------------------------|-------------------------------------------|----------------------|
|                                        |                      | No missing data <sup>b</sup><br>(N=3,075) | Incomplete data <sup>c</sup><br>(N=4,542) |                      |
| Mother's marital status at birth       | 7,045                |                                           |                                           | <0.001               |
| <i>Married</i>                         |                      | 2,994 (97.4)                              | 3,676 (92.5)                              |                      |
| <i>Separated</i>                       |                      | 15 (0.5)                                  | 64 (1.6)                                  |                      |
| <i>Divorced</i>                        |                      | 4 (0.1)                                   | 18 (0.5)                                  |                      |
| <i>Widowed</i>                         |                      | 0 (0.0)                                   | 5 (0.1)                                   |                      |
| <i>Single</i>                          |                      | 60 (2.0)                                  | 209 (5.3)                                 |                      |
| Number of older siblings at birth      | 7,052                | 0.94 (1.2)                                | 1.05 (1.3)                                | <0.001               |
| Father's occupational class at age 16y | 6,798                |                                           |                                           | 0.005                |
| <i>I Professional/II Intermediate</i>  |                      | 1,112 (36.8)                              | 1,244 (33.0)                              |                      |
| <i>III Skilled non-manual</i>          |                      | 329 (10.9)                                | 445 (11.8)                                |                      |
| <i>III Skilled manual</i>              |                      | 1,172 (38.7)                              | 1,499 (39.7)                              |                      |
| <i>IV Partly skilled/V Unskilled</i>   |                      | 412 (13.6)                                | 585 (15.5)                                |                      |

<sup>a</sup>Ns presented vary due to missing data

<sup>b</sup> Those participants in the main analytic sample (N=7'617) who have complete data for all key variables (father's occupational class at age 5y, mother's highest qualification at age 5y, father's highest qualifications at age 5y, own occupational class at age 46y, own highest qualification at age 46y, birth weight, BMI at age 10y, leisure-time physical activity at age 10y, sedentary behaviour at age 10y, disability at age 10y, height at age 46y, BMI at age 46y, smoking status at age 42y, sedentary behaviour at age 42y, leisure-time physical activity at age 42y, occupational activity at age 46y and grip strength at age 46).

<sup>c</sup> Those participants in the main analytic sample who have missing data on at least one key variable (father's occupational class at age 5y, mother's highest qualification at age 5y, father's highest qualifications at age 5y, own occupational class at age 46y, own highest qualification at age 46y, birth weight, BMI at age 10y, leisure-time physical activity at age 10y, sedentary behaviour at age 10y, disability at age 10y, height at age 46y, BMI at age 46y, smoking status at age 42y, sedentary behaviour at age 42y, leisure-time physical activity at age 42y and/or occupational activity at age 46y).

<sup>d</sup> p-values from chi-squared or t-tests comparing the two groups, as appropriate

**Table S3: Associations between indicators of childhood socioeconomic position and grip strength at age 46 years in the BCS70 (linear regression models in A) Females (n=3,922) and B) Males (n=3,695))**

| Socioeconomic indicators                                       | Model 1                  |                     | Model 2                  |                     | Model 3                  |                     | Model 4                  |                     | Model 5                  |                     |
|----------------------------------------------------------------|--------------------------|---------------------|--------------------------|---------------------|--------------------------|---------------------|--------------------------|---------------------|--------------------------|---------------------|
|                                                                | Coefficient <sup>a</sup> | 95% CI <sup>b</sup> | Coefficient <sup>a</sup> | 95% CI <sup>b</sup> | Coefficient <sup>a</sup> | 95% CI <sup>b</sup> | Coefficient <sup>a</sup> | 95% CI <sup>b</sup> | Coefficient <sup>a</sup> | 95% CI <sup>b</sup> |
| <b>Father's occupational class at age 5</b>                    |                          |                     |                          |                     |                          |                     |                          |                     |                          |                     |
| A) Female                                                      |                          |                     |                          |                     |                          |                     |                          |                     |                          |                     |
| <i>I Professional/II Intermediate</i>                          | 0.00 (ref)               | —                   | 0.00 (ref)               | —                   | 0.00 (ref)               | —                   | 0.00 (ref)               | —                   | 0.00 (ref)               | —                   |
| <i>III Skilled non-manual</i>                                  | -0.54                    | -1.21, 0.13         | -0.39                    | -1.03, 0.26         | -0.42                    | -1.06, 0.23         | -0.37                    | -1.01, 0.27         | -0.33                    | -0.97, 0.31         |
| <i>III Skilled manual</i>                                      | -1.30                    | -1.75, -0.85        | -0.87                    | -1.31, -0.44        | -0.88                    | -1.31, -0.44        | -0.82                    | -1.26, -0.38        | -0.74                    | -1.19, -0.29        |
| <i>IV Partly skilled/V Unskilled</i>                           | -1.42                    | -1.97, -0.87        | -0.84                    | -1.37, -0.30        | -0.77                    | -1.31, -0.24        | -0.74                    | -1.28, -0.20        | -0.64                    | -1.19, -0.08        |
| p-values (overall <sup>c</sup> ; test for trend <sup>d</sup> ) | <0.001; <0.001           |                     | <0.001; <0.001           |                     | <0.001; <0.001           |                     | <0.01; <0.001            |                     | 0.01; <0.01              |                     |
| B) Male                                                        |                          |                     |                          |                     |                          |                     |                          |                     |                          |                     |
| <i>I Professional/II Intermediate</i>                          | 0.00 (ref)               | —                   | 0.00 (ref)               | —                   | 0.00 (ref)               | —                   | 0.00 (ref)               | —                   | 0.00 (ref)               | —                   |
| <i>III Skilled non-manual</i>                                  | -0.72                    | -1.77, 0.33         | -0.64                    | -1.65, 0.37         | -0.60                    | -1.60, 0.40         | -0.62                    | -1.59, 0.35         | -0.73                    | -1.70, 0.25         |
| <i>III Skilled manual</i>                                      | -0.08                    | -0.78, 0.63         | 0.46                     | -0.23, 1.15         | 0.47                     | -0.22, 1.15         | -0.29                    | -0.97, 0.40         | -0.42                    | -1.12, 0.27         |
| <i>IV Partly skilled/V Unskilled</i>                           | -0.68                    | -1.59, 0.23         | 0.06                     | -0.83, 0.95         | 0.05                     | -0.83, 0.94         | -0.65                    | -1.53, 0.23         | -0.77                    | -1.66, 0.12         |
| p-values (overall <sup>c</sup> ; test for trend <sup>d</sup> ) | 0.29; 0.35               |                     | 0.14; 0.33               |                     | 0.15; 0.34               |                     | 0.42; 0.20               |                     | 0.28; 0.11               |                     |
| <b>Mother's highest qualification at age 5</b>                 |                          |                     |                          |                     |                          |                     |                          |                     |                          |                     |
| A) Female                                                      |                          |                     |                          |                     |                          |                     |                          |                     |                          |                     |
| <i>Vocational/degree and higher</i>                            | 0.00 (ref)               | —                   | 0.00 (ref)               | —                   | 0.00 (ref)               | —                   | 0.00 (ref)               | —                   | 0.00 (ref)               | —                   |
| <i>A-level/equivalent</i>                                      | -0.48                    | -1.64, 0.69         | -0.55                    | -1.67, 0.56         | -0.50                    | -1.61, 0.61         | -0.44                    | -1.55, 0.67         | -0.39                    | -1.50, 0.73         |
| <i>Vocational/O-level/equivalent</i>                           | -0.84                    | -1.56, -0.11        | -0.68                    | -1.38, 0.03         | -0.70                    | -1.40, 0.00         | -0.73                    | -1.42, -0.04        | -0.63                    | -1.33, 0.08         |
| <i>No qualification</i>                                        | -1.46                    | -2.14, -0.78        | -1.01                    | -1.67, -0.35        | -1.00                    | -1.66, -0.35        | -0.99                    | -1.65, -0.33        | -0.84                    | -1.53, -0.16        |
| p-values (overall <sup>c</sup> ; test for trend <sup>d</sup> ) | <0.001; <0.001           |                     | <0.01; 0.01              |                     | 0.02; <0.01              |                     | 0.02; <0.01              |                     | 0.09; 0.01               |                     |
| B) Male                                                        |                          |                     |                          |                     |                          |                     |                          |                     |                          |                     |
| <i>Vocational/degree and higher</i>                            | 0.00 (ref)               | —                   | 0.00 (ref)               | —                   | 0.00 (ref)               | —                   | 0.00 (ref)               | —                   | 0.00 (ref)               | —                   |
| <i>A-level/equivalent</i>                                      | -0.65                    | -2.40, 1.10         | -0.57                    | -2.27, 1.12         | -0.46                    | -2.15, 1.23         | -1.15                    | -2.81, 0.52         | -1.28                    | -2.94, 0.38         |
| <i>Vocational/O-level/equivalent</i>                           | 0.50                     | -0.61, 1.62         | 0.88                     | -0.21, 1.97         | 0.94                     | -0.15, 2.03         | 0.36                     | -0.71, 1.43         | 0.14                     | -0.94, 1.23         |
| <i>No qualification</i>                                        | 0.17                     | -0.89, 1.24         | 0.97                     | -0.07, 2.01         | 1.03                     | -0.01, 2.07         | 0.02                     | -1.02, 1.06         | -0.27                    | -1.33, 0.78         |
| p-values (overall <sup>c</sup> ; test for trend <sup>d</sup> ) | 0.45; 0.70               |                     | 0.07; 0.03               |                     | 0.06; 0.02               |                     | 0.24; 0.75               |                     | 0.24; 0.80               |                     |
| <b>Father's highest qualification at age 5</b>                 |                          |                     |                          |                     |                          |                     |                          |                     |                          |                     |
| A) Female                                                      |                          |                     |                          |                     |                          |                     |                          |                     |                          |                     |
| <i>Vocational/degree and higher</i>                            | 0.00 (ref)               | —                   | 0.00 (ref)               | —                   | 0.00 (ref)               | —                   | 0.00 (ref)               | —                   | 0.00 (ref)               | —                   |
| <i>A-level/equivalent</i>                                      | -0.22                    | -1.03, 0.60         | 0.08                     | -0.72, 0.87         | 0.05                     | -0.74, 0.83         | 0.07                     | -0.70, 0.85         | 0.15                     | -0.63, 0.93         |
| <i>Vocational/O-level/equivalent</i>                           | -0.58                    | -1.18, 0.02         | -0.34                    | -0.92, 0.24         | -0.35                    | -0.93, 0.22         | -0.32                    | -0.90, 0.25         | -0.23                    | -0.81, 0.35         |
| <i>No qualification</i>                                        | -1.00                    | -1.55, -0.45        | -0.50                    | -1.03, 0.04         | -0.54                    | -1.07, 0.00         | -0.45                    | -1.00, 0.10         | -0.31                    | -0.87, 0.26         |
| p-values (overall <sup>c</sup> ; test for trend <sup>d</sup> ) | <0.01; <0.001            |                     | 0.18; 0.04               |                     | 0.15; 0.03               |                     | 0.28; 0.06               |                     | 0.54; 0.19               |                     |
| B) Male                                                        |                          |                     |                          |                     |                          |                     |                          |                     |                          |                     |
| <i>Vocational/degree and higher</i>                            | 0.00 (ref)               | —                   | 0.00 (ref)               | —                   | 0.00 (ref)               | —                   | 0.00 (ref)               | —                   | 0.00 (ref)               | —                   |
| <i>A-level/equivalent</i>                                      | 0.13                     | -1.20, 1.45         | 0.40                     | -0.88, 1.67         | 0.26                     | -1.01, 1.53         | -0.22                    | -1.47, 1.03         | -0.36                    | -1.62, 0.89         |
| <i>Vocational/O-level/equivalent</i>                           | 0.44                     | -0.51, 1.38         | 0.70                     | -0.22, 1.61         | 0.62                     | -0.30, 1.53         | -0.10                    | -1.00, 0.79         | -0.27                    | -1.18, 0.64         |

|                                                                |      |             |      |             |      |             |       |             |       |             |
|----------------------------------------------------------------|------|-------------|------|-------------|------|-------------|-------|-------------|-------|-------------|
| <i>No qualification</i>                                        | 0.63 | -0.23, 1.49 | 1.22 | 0.37, 2.07  | 1.19 | 0.35, 2.04  | -0.12 | -0.97, 0.74 | -0.31 | -1.19, 0.57 |
| p-values (overall <sup>c</sup> ; test for trend <sup>d</sup> ) |      | 0.45; 0.12  |      | 0.03; <0.01 |      | 0.03; <0.01 |       | 0.93; 0.74  |       | 0.85; 0.55  |

Note 1: results are combined from analyses run across 50 imputed datasets.

Note 2: sample was restricted to those with valid measures of grip strength at age 46 years (including those 70 individuals unable for health reasons with imputed values).

Model 1: unadjusted (p-values from formal tests of sex interaction,  $p=0.01$  for Fathers occupational class at age 5y,  $p=0.03$  for Mother's highest qualification at age 5y and  $p=0.01$  for Father's highest qualification at age 5y).

Model 2: adjusted for height at age 46y.

Model 3: adjusted for Model 2 + birth weight (kg), BMI at age 10y ( $\text{kg}/\text{m}^2$ ), leisure-time physical activity at age 10y, sedentary behaviour (TV watching) at age 10y and disability at age 10y,

Model 4: adjusted for Model 3 + BMI at age 46y ( $\text{kg}/\text{m}^2$ ) + smoking status at age 42y, sedentary behaviour (TV watching) at age 42y, leisure-time physical activity (days/week) at age 42y and occupational activity at age 46y.

Model 5: adjusted for Model 4 + own occupation at age 46y + own highest qualification at age 46y.

<sup>a</sup> Coefficient: Difference in mean grip strength (kg).

<sup>b</sup> CI: Confidence Interval.

<sup>c</sup> P-value: p-value from a likelihood ratio test of the overall association.

<sup>d</sup> P-trend: p-value not presented for relationship where there was significant deviation from linearity.



**Table S4: Associations between indicators of adulthood socioeconomic position and grip strength at age 46 years in the BCS70 (linear regression models in A) Females (n=3,922) and B) Males (n=3,695))**

| Socioeconomic indicators                                       | Model 1                  |                     | Model 2                  |                     | Model 3                  |                     | Model 4                  |                     |
|----------------------------------------------------------------|--------------------------|---------------------|--------------------------|---------------------|--------------------------|---------------------|--------------------------|---------------------|
|                                                                | Coefficient <sup>a</sup> | 95% CI <sup>b</sup> | Coefficient <sup>a</sup> | 95% CI <sup>b</sup> | Coefficient <sup>a</sup> | 95% CI <sup>b</sup> | Coefficient <sup>a</sup> | 95% CI <sup>b</sup> |
| <b>Own occupational class at age 46y</b>                       |                          |                     |                          |                     |                          |                     |                          |                     |
| A) Female                                                      |                          |                     |                          |                     |                          |                     |                          |                     |
| <i>I Professional/II Intermediate</i>                          | 0.00 (ref)               | —                   | 0.00 (ref)               | —                   | 0.00 (ref)               | —                   | 0.00 (ref)               | —                   |
| <i>III Skilled non-manual</i>                                  | -0.78                    | -1.23, -0.32        | -0.57                    | -1.01, -0.13        | -0.44                    | -0.88, 0.00         | -0.33                    | -0.77, 0.11         |
| <i>III Skilled manual</i>                                      | -0.50                    | -1.20, 0.20         | -0.20                    | -0.88, 0.47         | -0.17                    | -0.84, 0.51         | -0.31                    | -1.01, 0.39         |
| <i>IV Partly skilled/V Unskilled</i>                           | -0.92                    | -1.56, -0.27        | -0.53                    | -1.16, 0.09         | -0.49                    | -1.10, 0.12         | -0.64                    | -1.33, 0.05         |
| p-values (overall <sup>c</sup> ; test for trend <sup>d</sup> ) |                          | <0.01; <0.01        |                          | 0.05; 0.08          |                          | 0.14; 0.12          |                          | 0.18; 0.06          |
| B) Male                                                        |                          |                     |                          |                     |                          |                     |                          |                     |
| <i>I Professional/II Intermediate</i>                          | 0.00 (ref)               | —                   | 0.00 (ref)               | —                   | 0.00 (ref)               | —                   | 0.00 (ref)               | —                   |
| <i>III Skilled non-manual</i>                                  | -0.76                    | -1.70, 0.17         | -0.66                    | -1.57, 0.25         | -0.57                    | -1.48, 0.33         | -0.84                    | -1.73, 0.05         |
| <i>III Skilled manual</i>                                      | 1.33                     | 0.60, 2.06          | 1.88                     | 1.17, 2.59          | 1.92                     | 1.21, 2.62          | 0.01                     | -0.85, 0.88         |
| <i>IV Partly skilled/V Unskilled</i>                           | -0.64                    | -1.81, 0.54         | -0.02                    | -1.16, 1.12         | 0.23                     | -0.91, 1.37         | -1.25                    | -2.50, 0.00         |
| p-values (overall <sup>c</sup> ; test for trend <sup>d</sup> ) |                          | <0.001; -           |                          | <0.001; -           |                          | <0.001; -           |                          | 0.06; 0.17          |
| <b>Own highest qualification at age 46y</b>                    |                          |                     |                          |                     |                          |                     |                          |                     |
| A) Female                                                      |                          |                     |                          |                     |                          |                     |                          |                     |
| Degree and higher                                              | 0.00 (ref)               | —                   | 0.00 (ref)               | —                   | 0.00 (ref)               | —                   | 0.00 (ref)               | —                   |
| <i>Advance and vocational qualification</i>                    | -0.63                    | -1.21, -0.05        | -0.43                    | -0.99, 0.13         | -0.50                    | -1.05, 0.06         | -0.62                    | -1.18, -0.05        |
| <i>GCSEs</i>                                                   | -0.65                    | -1.13, -0.17        | -0.29                    | -0.75, 0.18         | -0.25                    | -0.71, 0.21         | -0.29                    | -0.77, 0.18         |
| <i>No qualification</i>                                        | -1.25                    | -1.76, -0.75        | -0.80                    | -1.29, -0.31        | -0.74                    | -1.23, -0.25        | -0.76                    | -1.28, -0.24        |
| p-values (overall <sup>c</sup> ; test for trend <sup>d</sup> ) |                          | <0.001; <0.001      |                          | 0.01; <0.01         |                          | <0.02; 0.01         |                          | 0.02; 0.2           |
| Male                                                           |                          |                     |                          |                     |                          |                     |                          |                     |
| Degree and higher                                              | 0.00 (ref)               | —                   | 0.00 (ref)               | —                   | 0.00 (ref)               | —                   | 0.00 (ref)               | —                   |
| <i>A-level and vocational qualification</i>                    | 1.46                     | 0.46, 2.46          | 1.76                     | 0.79, 2.73          | 1.67                     | 0.71, 2.64          | 1.12                     | 0.17, 2.08          |
| <i>GCSEs</i>                                                   | 1.68                     | 0.89, 2.46          | 2.16                     | 1.40, 2.92          | 2.18                     | 1.43, 2.94          | 0.97                     | 0.16, 1.77          |
| <i>No qualification</i>                                        | 1.59                     | 0.81, 2.36          | 2.26                     | 1.50, 3.02          | 2.34                     | 1.58, 3.10          | 1.12                     | 0.29, 1.95          |
| p-values (overall <sup>c</sup> ; test for trend <sup>d</sup> ) |                          | <0.001; -           |                          | <0.001; -           |                          | <0.001; -           |                          | 0.03; 0.02          |

Note 1: results are combined from analyses run across 50 imputed datasets.

Note 2: sample was restricted to those with valid measures of grip strength at age 46 years (including those 70 individuals unable for health reasons with imputed values).

Model 1: unadjusted (p-values from formal tests of sex interaction, p<0.01 for own occupation at age 46y, and p<0.001 for own highest qualification at age 46y)

Model 2: adjusted for height at age 46y.

Model 3: adjusted for Model 2 + birth weight (kg), BMI at age 10y (kg/m<sup>2</sup>), leisure-time physical activity at age 10y, sedentary behaviour (TV watching) at age 10y and disability at age 10y,

Model 4: adjusted for Model 3 + BMI at age 46y (kg/m<sup>2</sup>) + smoking status at age 42y, sedentary behaviour (TV watching) at age 42y, leisure-time physical activity (days/week) at age 42y and occupational activity at age 46y.

Model 5: adjusted for Model 4 + own occupation at age 46y + own highest qualification at age 46y.

<sup>a</sup> Coefficient: Difference in mean grip strength (kg).

<sup>b</sup> CI: Confidence Interval.

<sup>c</sup> P-value: p-value from a likelihood ratio test of the overall association.

<sup>d</sup> P-trend: p-value not presented for relationship where there was significant deviation from linearity.

**Table S5: Associations between adulthood socioeconomic position and grip strength at age 46 years in the BCS70 with individual adjustments for each adult covariate (linear regression models in Males (n=3,695))**

|                                                                | <b>Model 4a</b>                                 | <b>Model 4b</b>                                 | <b>Model 4c</b>                                 | <b>Model 4d</b>                                 | <b>Model 4e</b>                                 |
|----------------------------------------------------------------|-------------------------------------------------|-------------------------------------------------|-------------------------------------------------|-------------------------------------------------|-------------------------------------------------|
| Occupational class <sup>1</sup>                                | Coefficient <sup>a</sup> (95% CI <sup>b</sup> ) | Coefficient <sup>a</sup> (95% CI <sup>b</sup> ) | Coefficient <sup>a</sup> (95% CI <sup>b</sup> ) | Coefficient <sup>a</sup> (95% CI <sup>b</sup> ) | Coefficient <sup>a</sup> (95% CI <sup>b</sup> ) |
| <b>Own occupational class at age 46y</b>                       |                                                 |                                                 |                                                 |                                                 |                                                 |
| <i>I Professional/II Intermediate</i>                          | 0.00 (ref)                                      | 0.00 (ref)                                      | 0.00 (ref)                                      | 0.00 (ref)                                      | 0.00 (ref)                                      |
| <i>III Skilled non-manual</i>                                  | -0.71 (-1.61, 0.19)                             | -0.56 (-1.46, 0.35)                             | -0.43 (-1.33, 0.48)                             | -0.62 (-1.52, 0.28)                             | -0.83 (-1.74, 0.07)                             |
| <i>III Skilled manual</i>                                      | 1.83 (1.13, 2.53)                               | 2.00 (1.28, 2.72)                               | 2.17 (1.45, 2.89)                               | 1.86 (1.15, 2.57)                               | -0.26 (-1.13, 0.62)                             |
| <i>IV Partly skilled/V Unskilled</i>                           | 0.27 (-0.86, 1.39)                              | 0.33 (-0.83, 1.48)                              | 0.78 (-0.39, 1.96)                              | 0.01 (-1.13, 1.15)                              | -1.84 (-3.08, -0.60)                            |
| p-values (overall <sup>c</sup> ; test for trend <sup>d</sup> ) | <0.001; -                                       | <0.001; -                                       | <0.001; -                                       | <0.001; -                                       | 0.02; 0.02                                      |
| <b>Own highest qualification at age 46y</b>                    |                                                 |                                                 |                                                 |                                                 |                                                 |
| Degree and higher                                              | 0.00 (ref)                                      | 0.00 (ref)                                      | 0.00 (ref)                                      | 0.00 (ref)                                      | 0.00 (ref)                                      |
| <i>A-level and vocational qualification</i>                    | 1.39 (0.43, 2.35)                               | 1.71 (0.74, 2.67)                               | 1.82 (0.86, 2.79)                               | 1.66 (0.70, 2.62)                               | 1.28 (0.32, 2.24)                               |
| <i>GCSEs</i>                                                   | 1.81 (1.05, 2.57)                               | 2.25 (1.49, 3.02)                               | 2.44 (1.67, 3.21)                               | 2.16 (1.40, 2.92)                               | 1.11 (0.31, 1.90)                               |
| <i>No qualification</i>                                        | 2.04 (1.29, 2.80)                               | 2.45 (1.68, 3.23)                               | 2.71 (1.93, 3.49)                               | 2.34 (1.58, 3.11)                               | 1.01 (0.19, 1.82)                               |
| p-values (overall <sup>c</sup> ; test for trend <sup>d</sup> ) | <0.001; <0.001                                  | <0.001; -                                       | <0.001; -                                       | <0.001; -                                       | 0.02; 0.03                                      |

Note 1: results are combined from analyses run across 50 imputed datasets.

Note 2: sample was restricted to those with valid measures of grip strength at age 46 years (including those 70 individuals unable for health reasons with imputed values).

Model 3: adjusted for height at age 46y + birth weight (kg), BMI at age 10y (kg/m<sup>2</sup>), leisure-time physical activity at age 10y, sedentary behaviour (TV watching) at age 10y and disability at age 10y.

Model 4a: adjusted for Model 3 + BMI at age 46y (kg/m<sup>2</sup>).

Model 4b: adjusted for Model 3 + smoking status at age 42y.

Model 4c: adjusted for Model 3 + sedentary behaviour (TV watching) at age 42y.

Model 4d: adjusted for Model 3 + leisure-time physical activity at age 42y.

Model 4e: adjusted for Model 3 + occupational activity at age 46y.

<sup>a</sup> Coefficient: Difference in mean grip strength (kg).

<sup>b</sup> CI: Confidence Interval.

<sup>c</sup> P-value: p-value from a likelihood ratio test of the overall association.

<sup>d</sup> P-trend: p-value not presented for relationship where there was significant deviation from linearity.

**Table S6: Unadjusted associations between indicators of childhood and adulthood socioeconomic position and grip strength at age 46 years in the BCS70 on observed data (linear regression models in A) Females (n=3,922) and B) Males (n=3,695))**

| Socioeconomic indicators                                       | A) Female |                          |                     | B) Male |                          |                     |
|----------------------------------------------------------------|-----------|--------------------------|---------------------|---------|--------------------------|---------------------|
|                                                                | N         | Coefficient <sup>a</sup> | 95% CI <sup>b</sup> | N       | Coefficient <sup>a</sup> | 95% CI <sup>b</sup> |
| <b>Father's occupational class at age 5y</b>                   | 3,728     |                          |                     | 3,470   |                          |                     |
| <i>I Professional/II Intermediate</i>                          |           | 0.00 (ref)               | —                   |         | 0.00 (ref)               | —                   |
| <i>III Skilled non-manual</i>                                  |           | -0.57                    | -1.23, 0.10         |         | -0.66                    | -1.71, 0.39         |
| <i>III Skilled manual</i>                                      |           | -1.32                    | -1.78, -0.87        |         | -0.06                    | -0.77, 0.66         |
| <i>IV Partly skilled/V Unskilled</i>                           |           | -1.42                    | -1.98, -0.87        |         | -0.64                    | -1.56, 0.29         |
| p-values (overall <sup>c</sup> ; test for trend <sup>d</sup> ) |           | 3,728                    | <0.001; <0.001      |         |                          | 0.36; 0.40          |
| <b>Mother's highest qualification at age 5y</b>                | 3,079     |                          |                     | 2,852   |                          |                     |
| <i>Vocational/degree and higher</i>                            |           | 0.00 (ref)               | —                   |         | 0.00 (ref)               | —                   |
| <i>A-level/equivalent</i>                                      |           | -0.31                    | -1.47, 0.86         |         | -0.93                    | -2.81, 0.94         |
| <i>Vocational/O-level/equivalent</i>                           |           | -0.82                    | -1.56, -0.07        |         | 0.33                     | -0.88, 1.54         |
| <i>No qualification</i>                                        |           | -1.46                    | -2.18, -0.74        |         | -0.06                    | -1.24, 1.11         |
| p-values (overall <sup>3</sup> ; test for trend <sup>d</sup> ) |           |                          | <0.001; <0.001      |         |                          | 0.43; 0.99          |
| <b>Father's highest qualification at age 5y</b>                | 2,870     |                          |                     | 2,695   |                          |                     |
| <i>Vocational/degree and higher</i>                            |           | 0.00 (ref)               | —                   |         | 0.00 (ref)               | —                   |
| <i>A-level/equivalent</i>                                      |           | -0.17                    | -1.05, 0.71         |         | 0.00                     | -1.43, 1.43         |
| <i>Vocational/O-level/equivalent</i>                           |           | -0.51                    | -1.14, 0.13         |         | 0.37                     | -0.64, 1.38         |
| <i>No qualification</i>                                        |           | -0.98                    | -1.57, -0.38        |         | 0.68                     | -0.26, 1.62         |
| p-values (overall <sup>c</sup> ; test for trend <sup>d</sup> ) |           |                          | <0.01; <0.001       |         |                          | 0.47; 0.12          |
| <b>Own occupational class at age 46y</b>                       | 2,870     |                          |                     | 2,695   |                          |                     |
| <i>I Professional/II Intermediate</i>                          |           | 0.00 (ref)               | —                   |         | 0.00 (ref)               | —                   |
| <i>III Skilled non-manual</i>                                  |           | -0.64                    | -1.10, -0.19        |         | -0.56                    | -1.46, 0.33         |
| <i>III Skilled manual</i>                                      |           | -0.06                    | -0.74, 0.61         |         | 1.90                     | 1.21, 2.60          |
| <i>IV Partly skilled/V Unskilled</i>                           |           | -0.49                    | -1.13, 0.15         |         | 0.35                     | -0.79, 1.49         |
| p-values (overall <sup>c</sup> ; test for trend <sup>d</sup> ) |           |                          | 0.03; -             |         |                          | <0.001; -           |
| <b>Own highest qualification at age 46y</b>                    | 2,870     |                          |                     | 2,695   |                          |                     |
| <i>Degree and higher</i>                                       |           | 0.00 (ref)               | —                   |         | 0.00 (ref)               | —                   |
| <i>A-level and vocational qualification</i>                    |           | -0.64                    | -1.22, -0.06        |         | 1.48                     | 0.48, 2.48          |
| <i>GCSEs</i>                                                   |           | -0.66                    | -1.13, -0.18        |         | 1.71                     | 0.93, 2.49          |
| <i>No qualification</i>                                        |           | -1.26                    | -1.77, -0.76        |         | 1.63                     | 0.85, 2.41          |
| p-values (overall <sup>c</sup> ; test for trend <sup>d</sup> ) |           |                          | <0.01; <0.001       |         |                          | <0.001; -           |

Note 1: results are combined from analyses run across 50 imputed datasets.

Note 2: sample was restricted to those with valid measures of grip strength at age 46 years (including those 70 individuals unable for health reasons with imputed values)

Note 3: results displayed for unadjusted model (p-values from formal tests of sex interaction, p=0.01 for fathers occupational class at age 5y, p=0.05 for mother's highest qualification at age 5y, p=0.01 for father's highest qualification at age 5y; p<0.01 for own occupational class at age 46y and p<0.001 for own highest qualification at age 46y). \*70 participants unable to complete the grip strength tests for health reasons were included by allocating them grip strength values equivalent to the mean of the bottom sex-specific fifth.

<sup>a</sup> Coefficient: Difference in mean grip strength (kg); <sup>b</sup> CI: Confidence Interval; <sup>c</sup> P-value: p-value from a likelihood ratio test of the overall association; <sup>d</sup> P-trend: p-value not presented for relationship where there was significant deviation from linearity.

**Table S7: Associations between indicators of childhood and adulthood socioeconomic position and grip strength at age 46 years in the BCS70 on the sample who completed the grip strength assessment standing unsupported (linear regression models in A) Females (n=3,498) and B) Males (n=3,392))**

| Socioeconomic indicators                                       | A) Female                |                     |                          |                     | B) Male                  |                     |                          |                     |
|----------------------------------------------------------------|--------------------------|---------------------|--------------------------|---------------------|--------------------------|---------------------|--------------------------|---------------------|
|                                                                | Model 1                  |                     | Model 4                  |                     | Model 1                  |                     | Model 4                  |                     |
|                                                                | Coefficient <sup>a</sup> | 95% CI <sup>b</sup> | Coefficient <sup>a</sup> | 95% CI <sup>b</sup> | Coefficient <sup>a</sup> | 95% CI <sup>b</sup> | Coefficient <sup>a</sup> | 95% CI <sup>b</sup> |
| <b>Father's occupational class at age 5</b>                    |                          |                     |                          |                     |                          |                     |                          |                     |
| <i>I Professional/II Intermediate</i>                          | 0.00 (ref)               | —                   | 0.00 (ref)               | —                   | 0.00 (ref)               | —                   | 0.00 (ref)               | —                   |
| <i>III Skilled non-manual</i>                                  | -0.37                    | -1.05, 0.31         | -0.24                    | -0.89, 0.41         | -0.74                    | -1.82, 0.33         | -0.70                    | -1.70, 0.29         |
| <i>III Skilled manual</i>                                      | -1.06                    | -1.52, -0.59        | -0.69                    | -1.15, -0.24        | -0.12                    | -1.30, 0.60         | -0.37                    | -1.07, 0.33         |
| <i>IV Partly skilled/V Unskilled</i>                           | -1.22                    | -1.79, -0.65        | -0.59                    | -1.15, -0.03        | -0.65                    | -1.58, 0.28         | -0.66                    | -1.55, 0.24         |
| p-values (overall <sup>c</sup> ; test for trend <sup>d</sup> ) |                          | <0.001; <0.001      |                          | 0.02; <0.01         |                          | 0.36; 0.35          |                          | 0.39; 0.18          |
| <b>Mother's highest qualification at age 5</b>                 |                          |                     |                          |                     |                          |                     |                          |                     |
| <i>Vocational/degree and higher</i>                            | 0.00 (ref)               | —                   | 0.00 (ref)               | —                   | 0.00 (ref)               | —                   | 0.00 (ref)               | —                   |
| <i>A-level/equivalent</i>                                      | -0.55                    | -1.75, 0.65         | -0.54                    | -1.68, 0.59         | -0.43                    | -2.23, 1.36         | -1.00                    | -2.70, 0.71         |
| <i>Vocational/O-level/equivalent</i>                           | -0.83                    | -1.57, -0.09        | -0.76                    | -1.47, -0.06        | 0.72                     | -0.41, 1.85         | 0.46                     | -0.62, 1.53         |
| <i>No qualification</i>                                        | -1.35                    | -2.04, -0.65        | -0.98                    | -1.66, -0.31        | 0.24                     | -0.84, 1.31         | -0.05                    | -1.10, 1.00         |
| p-values (overall <sup>c</sup> ; test for trend <sup>d</sup> ) |                          | <0.001; <0.001      |                          | 0.03; <0.01         |                          | 0.31; 0.74          |                          | 0.21; 0.98          |
| <b>Father's highest qualification at age 5</b>                 |                          |                     |                          |                     |                          |                     |                          |                     |
| <i>Vocational/degree and higher</i>                            | 0.00 (ref)               | —                   | 0.00 (ref)               | —                   | 0.00 (ref)               | —                   | 0.00 (ref)               | —                   |
| <i>A-level/equivalent</i>                                      | 0.05                     | -0.81, 0.91         | 0.30                     | -0.51, 1.12         | 0.28                     | -1.08, 1.63         | -0.05                    | -1.33, 1.23         |
| <i>Vocational/O-level/equivalent</i>                           | -0.45                    | -1.09, 0.19         | -0.23                    | -0.84, 0.38         | 0.46                     | -0.50, 1.42         | -0.11                    | -1.03, 0.80         |
| <i>No qualification</i>                                        | -0.72                    | -1.29, -0.14        | -0.30                    | -0.87, 0.28         | 0.67                     | -0.22, 1.55         | -0.11                    | -1.00, 0.78         |
| p-values (overall <sup>c</sup> ; test for trend <sup>d</sup> ) |                          | 0.04; <0.01         |                          | 0.37; 0.17          |                          | 0.49; 0.13          |                          | 0.96; 0.81          |
| <b>Own occupational class at age 46y</b>                       |                          |                     |                          |                     |                          |                     |                          |                     |
| <i>I Professional/II Intermediate</i>                          | 0.00 (ref)               | —                   | 0.00 (ref)               | —                   | 0.00 (ref)               | —                   | 0.00 (ref)               | —                   |
| <i>III Skilled non-manual</i>                                  | -0.78                    | -1.25, -0.30        | -0.43                    | -0.89, 0.03         | -0.66                    | -1.61, 0.29         | -0.82                    | -1.72, 0.09         |
| <i>III Skilled manual</i>                                      | -0.36                    | -1.08, 0.37         | -0.26                    | -0.99, 0.47         | 1.47                     | 0.74, 2.20          | 0.13                     | -0.73, 0.99         |
| <i>IV Partly skilled/V Unskilled</i>                           | -0.62                    | -1.28, 0.04         | -0.45                    | -1.16, 0.26         | -0.71                    | -1.91, 0.49         | -1.36                    | -2.64, -0.07        |
| p-values (overall <sup>c</sup> ; test for trend <sup>d</sup> ) |                          | <0.01; -            |                          | 0.21; 0.15          |                          | <0.01; -            |                          | 0.03; -             |
| <b>Own highest qualification at age 46y</b>                    |                          |                     |                          |                     |                          |                     |                          |                     |
| <i>Degree and higher</i>                                       | 0.00 (ref)               | —                   | 0.00 (ref)               | —                   | 0.00 (ref)               | —                   | 0.00 (ref)               | —                   |
| <i>A-level and vocational qualification</i>                    | -0.67                    | -1.27, -0.07        | -0.67                    | -1.24, -0.09        | 1.61                     | 0.59, 2.64          | 1.25                     | 0.28, 2.22          |
| <i>GCSEs</i>                                                   | -0.60                    | -1.10, -0.11        | -0.31                    | -0.80, 0.18         | 1.65                     | 0.85, 2.45          | 0.86                     | 0.03, 1.68          |
| <i>No qualification</i>                                        | -0.81                    | -1.34, -0.29        | -0.42                    | -0.96, 0.12         | 1.79                     | 1.00, 2.58          | 1.25                     | 0.41, 2.09          |
| p-values (overall <sup>c</sup> ; test for trend <sup>d</sup> ) |                          | <0.01; <0.01        |                          | 0.14; 0.23          |                          | <0.001; <0.001      |                          | 0.02; <0.01         |

Note 1: results are combined from analyses run across 50 imputed datasets.

Note 2: sample was restricted to those with valid measures of grip strength at age 46 years (including those 70 individuals unable for health reasons with imputed values).

Model 1: unadjusted (p-values from formal tests of sex interaction, p<0.07 for fathers occupational class at age 5y, p<0.05 for mother's highest qualification at age 5y, p=0.06 for father's highest qualification at age 5y, p<0.01 for own occupational class at age 46y and p<0.001 for own highest qualification at age 46y).

---

Model 4: adjusted for Model 3 + BMI at age 46y ( $\text{kg}/\text{m}^2$ ) + smoking status at age 42y, sedentary behaviour (TV watching) at age 42y, leisure-time physical activity (days/week) at age 42y and occupational activity at age 46y.

<sup>a</sup> Coefficient: Difference in mean grip strength (kg).

<sup>b</sup> CI: Confidence Interval.

<sup>c</sup> P-value: p-value from a likelihood ratio test of the overall association.

<sup>d</sup> P-trend: p-value not presented for relationship where there was significant deviation from linearity.

**Table S8: Associations between indicators of childhood and adulthood socioeconomic position and grip strength at age 46 in the BCS70 excluding those participants unable to complete the grip strength assessments for health reasons (linear regression models in A) Females (n=3,872) and B) Males (n=3,675))**

| Socioeconomic indicators                                       | A) Female                |                     |                          |                     | B) Male                  |                     |                          |                     |
|----------------------------------------------------------------|--------------------------|---------------------|--------------------------|---------------------|--------------------------|---------------------|--------------------------|---------------------|
|                                                                | Model 1                  |                     | Model 4                  |                     | Model 1                  |                     | Model 4                  |                     |
|                                                                | Coefficient <sup>a</sup> | 95% CI <sup>b</sup> | Coefficient <sup>a</sup> | 95% CI <sup>b</sup> | Coefficient <sup>a</sup> | 95% CI <sup>b</sup> | Coefficient <sup>a</sup> | 95% CI <sup>b</sup> |
| <b>Father's occupational class at age 5</b>                    |                          |                     |                          |                     |                          |                     |                          |                     |
| <i>I Professional/II Intermediate</i>                          | 0.00 (ref)               | —                   | 0.00 (ref)               | —                   | 0.00 (ref)               | —                   | 0.00 (ref)               | —                   |
| <i>III Skilled non-manual</i>                                  | -0.56                    | -1.23, 0.11         | -0.40                    | -1.04, 0.24         | -0.75                    | -1.80, 0.29         | -0.65                    | -1.62, 0.32         |
| <i>III Skilled manual</i>                                      | -1.25                    | -1.70, -0.80        | -0.81                    | -1.25, -0.37        | -0.06                    | -0.77, 0.65         | -0.29                    | -0.98, 0.39         |
| <i>IV Partly skilled/V Unskilled</i>                           | -1.39                    | -1.94, -0.84        | -0.74                    | -1.28, -0.19        | -0.68                    | -1.59, 0.23         | -0.66                    | -1.54, 0.21         |
| p-values (overall <sup>c</sup> ; test for trend <sup>d</sup> ) |                          | <0.001; <0.001      |                          | <0.01; 0.001        |                          | 0.26; 0.37          |                          | 0.39; 0.19          |
| <b>Mother's highest qualification at age 5</b>                 |                          |                     |                          |                     |                          |                     |                          |                     |
| <i>Vocational/degree and higher</i>                            | 0.00 (ref)               | —                   | 0.00 (ref)               | —                   | 0.00 (ref)               | —                   | 0.00 (ref)               | —                   |
| <i>A-level/equivalent</i>                                      | -0.52                    | -1.69, 0.64         | -0.50                    | -1.60, 0.60         | -0.67                    | -2.42, 1.07         | -1.19                    | -2.84, 0.47         |
| <i>Vocational/O-level/equivalent</i>                           | -0.79                    | -1.52, -0.06        | -0.70                    | -1.40, -0.01        | 0.55                     | -0.57, 1.67         | 0.39                     | -0.67, 1.45         |
| <i>No qualification</i>                                        | -1.42                    | -2.10, -0.74        | -1.00                    | -1.66, -0.34        | 0.21                     | -0.85, 1.27         | 0.04                     | -1.00, 1.07         |
| p-values (overall <sup>c</sup> ; test for trend <sup>d</sup> ) |                          | <0.001; <0.001      |                          | 0.02; <0.01         |                          | 0.39; 0.64          |                          | 0.19; 0.72          |
| <b>Father's highest qualification at age 5</b>                 |                          |                     |                          |                     |                          |                     |                          |                     |
| <i>Vocational/degree and higher</i>                            | 0.00 (ref)               | —                   | 0.00 (ref)               | —                   | 0.00 (ref)               | —                   | 0.00 (ref)               | —                   |
| <i>A-level/equivalent</i>                                      | -0.20                    | -1.01, 0.62         | 0.10                     | -0.68, 0.88         | 0.16                     | -1.17, 1.49         | -0.21                    | -1.46, 1.04         |
| <i>Vocational/O-level/equivalent</i>                           | -0.52                    | -1.12, 0.08         | -0.28                    | -0.86, 0.30         | 0.42                     | -0.53, 1.37         | -0.13                    | -1.03, 0.76         |
| <i>No qualification</i>                                        | -0.94                    | -1.50, -0.39        | -0.44                    | -0.99, 0.11         | 0.63                     | -0.23, 1.50         | -0.14                    | -1.00, 0.72         |
| p-values (overall <sup>c</sup> ; test for trend <sup>d</sup> ) |                          | <0.01; <0.001       |                          | 0.30; 0.07          |                          | 0.47; 0.13          |                          | 0.93; 0.80          |
| <b>Own occupational class at age 46y</b>                       |                          |                     |                          |                     |                          |                     |                          |                     |
| <i>I Professional/II Intermediate</i>                          | 0.00 (ref)               | —                   | 0.00 (ref)               | —                   | 0.00 (ref)               | —                   | 0.00 (ref)               | —                   |
| <i>III Skilled non-manual</i>                                  | -0.72                    | -1.18, -0.27        | -0.30                    | -0.74, 0.15         | -0.77                    | -1.70, 0.16         | -0.86                    | -1.74, 0.02         |
| <i>III Skilled manual</i>                                      | -0.44                    | -1.15, 0.26         | -0.28                    | -0.98, 0.42         | 1.37                     | 0.64, 2.10          | 0.01                     | -0.85, 0.87         |
| <i>IV Partly skilled/V Unskilled</i>                           | -0.82                    | -1.47, -0.17        | -0.61                    | -1.30, 0.09         | -0.59                    | -1.77, 0.58         | -1.26                    | -2.51, -0.01        |
| p-values (overall <sup>c</sup> ; test for trend <sup>d</sup> ) |                          | <0.01; <0.01        |                          | 0.23; 0.08          |                          | <0.001; -           |                          | 0.05; -             |
| <b>Own highest qualification at age 46y</b>                    |                          |                     |                          |                     |                          |                     |                          |                     |
| <i>Degree and higher</i>                                       | 0.00 (ref)               | —                   | 0.00 (ref)               | —                   | 0.00 (ref)               | —                   | 0.00 (ref)               | —                   |
| <i>A-level and vocational qualification</i>                    | -0.58                    | -1.16, 0.00         | -0.59                    | -1.15, -0.03        | 1.48                     | 0.48, 2.48          | 1.12                     | 0.17, 2.07          |
| <i>GCSEs</i>                                                   | -0.57                    | -1.05, -0.10        | -0.24                    | -0.71, 0.24         | 1.69                     | 0.90, 2.47          | 0.96                     | 0.15, 1.76          |
| <i>No qualification</i>                                        | -1.19                    | -1.69, -0.68        | -0.74                    | -1.26, -0.21        | 1.67                     | 0.89, 2.45          | 1.18                     | 0.35, 2.01          |
| p-values (overall <sup>c</sup> ; test for trend <sup>d</sup> ) |                          | <0.001; <0.001      |                          | 0.02; 0.02          |                          | <0.001; <0.001      |                          | 0.02; 0.01          |

Note 1: results are combined from analyses run across 50 imputed datasets.

---

Model 1: unadjusted (p-values from formal tests of sex interaction,  $p < 0.01$  for fathers occupation at age 5y,  $p < 0.03$  for mother's highest qualification at age 5y,  $p = 0.02$  for father's highest qualification at age 5y,  $p < 0.01$  for own occupational class at age 46y and  $p < 0.001$  for own highest qualification at age 46y).

Model 4: adjusted for Model 3 + BMI at age 46y ( $\text{kg/m}^2$ ) + smoking status at age 42y, sedentary behaviour (TV watching) at age 42y, leisure-time physical activity (days/week) at age 42y and occupational activity at age 46y.

<sup>a</sup> Coefficient: Difference in mean grip strength (kg).

<sup>b</sup> CI: Confidence Interval.

<sup>c</sup> P-value: p-value from a likelihood ratio test of the overall association.

<sup>d</sup> P-trend: p-value not presented for relationship where there was significant deviation from linearity.

**Table S9: Associations between indicators childhood and adulthood socioeconomic position and grip strength at age 46 in the BCS70 excluding those participants classified as severely hampered according to the European Statistics of Income and Living Conditions (EU-SILC) classification disability definition or with missing disability data (linear regression models in A) Females (n=3,638) and B) Males (n=3,394))**

| Socioeconomic indicators                                       | A) Female                |                     |                          |                     | B) Male                  |                     |                          |                     |
|----------------------------------------------------------------|--------------------------|---------------------|--------------------------|---------------------|--------------------------|---------------------|--------------------------|---------------------|
|                                                                | Model 1                  |                     | Model 4                  |                     | Model 1                  |                     | Model 4                  |                     |
|                                                                | Coefficient <sup>a</sup> | 95% CI <sup>b</sup> | Coefficient <sup>a</sup> | 95% CI <sup>b</sup> | Coefficient <sup>a</sup> | 95% CI <sup>b</sup> | Coefficient <sup>a</sup> | 95% CI <sup>b</sup> |
| <b>Father's occupational class at age 5</b>                    |                          |                     |                          |                     |                          |                     |                          |                     |
| <i>I Professional/II Intermediate</i>                          | 0.00 (ref)               | —                   | 0.00 (ref)               | —                   | 0.00 (ref)               | —                   | 0.00 (ref)               | —                   |
| <i>III Skilled non-manual</i>                                  | -0.38                    | -1.04, 0.29         | -0.23                    | -0.87, 0.41         | -0.72                    | -1.77, 0.32         | -0.63                    | -1.59, 0.34         |
| <i>III Skilled manual</i>                                      | -1.00                    | -1.45, -0.56        | -0.65                    | -1.08, -0.22        | 0.03                     | -0.67, 0.74         | -0.30                    | -0.98, 0.38         |
| <i>IV Partly skilled/V Unskilled</i>                           | -1.15                    | -1.70, -0.60        | -0.59                    | -1.12, -0.05        | -0.31                    | -1.23, 0.60         | -0.52                    | -1.39, 0.36         |
| p-values (overall <sup>c</sup> ; test for trend <sup>d</sup> ) |                          | <0.001; <0.001      |                          | 0.02; <0.01         |                          | 0.46; <0.83         |                          | 0.52; 0.28          |
| <b>Mother's highest qualification at age 5</b>                 |                          |                     |                          |                     |                          |                     |                          |                     |
| <i>Vocational/degree and higher</i>                            | 0.00 (ref)               | —                   | 0.00 (ref)               | —                   | 0.00 (ref)               | —                   | 0.00 (ref)               | —                   |
| <i>A-level/equivalent</i>                                      | -0.38                    | -1.55, 0.80         | -0.38                    | -1.48, 0.73         | -0.55                    | -2.27, 1.18         | -1.15                    | -2.79, 0.48         |
| <i>Vocational/O-level/equivalent</i>                           | -0.71                    | -1.43, 0.00         | -0.66                    | -1.34, 0.02         | 0.61                     | -0.49, 1.71         | 0.40                     | -0.65, 1.44         |
| <i>No qualification</i>                                        | -1.43                    | -2.10, -0.75        | -1.12                    | -1.76, -0.47        | 0.41                     | -0.64, 1.46         | 0.11                     | -0.91, 1.13         |
| p-values (overall <sup>c</sup> ; test for trend <sup>d</sup> ) |                          | <0.001; <0.001      |                          | <0.01; <0.001       |                          | 0.40; 0.37          |                          | 0.20; 0.59          |
| <b>Father's highest qualification at age 5</b>                 |                          |                     |                          |                     |                          |                     |                          |                     |
| <i>Vocational/degree and higher</i>                            | 0.00 (ref)               | —                   | 0.00 (ref)               | —                   | 0.00 (ref)               | —                   | 0.00 (ref)               | —                   |
| <i>A-level/equivalent</i>                                      | 0.05                     | -0.74, 0.84         | 0.27                     | -0.48, 1.02         | 0.31                     | -1.03, 1.64         | -0.09                    | -1.34, 1.17         |
| <i>Vocational/O-level/equivalent</i>                           | -0.47                    | -1.05, 0.12         | -0.29                    | -0.85, 0.27         | 0.50                     | -0.44, 1.43         | -0.06                    | -0.96, 0.83         |
| <i>No qualification</i>                                        | -0.72                    | -1.26, -0.18        | -0.36                    | -0.90, 0.18         | 0.90                     | 0.04, 1.75          | 0.09                     | -0.76, 0.93         |
| p-values (overall <sup>c</sup> ; test for trend <sup>d</sup> ) |                          | 0.02; <0.01         |                          | 0.24; 0.09          |                          | 0.18; 0.03          |                          | 0.94; 0.80          |
| <b>Own occupational class at age 46y</b>                       |                          |                     |                          |                     |                          |                     |                          |                     |
| <i>I Professional/II Intermediate</i>                          | 0.00 (ref)               | —                   | 0.00 (ref)               | —                   | 0.00 (ref)               | —                   | 0.00 (ref)               | —                   |
| <i>III Skilled non-manual</i>                                  | -0.71                    | -1.15, -0.27        | -0.36                    | -0.79, 0.07         | -0.80                    | -1.70, 0.11         | -1.01                    | -1.87, -0.15        |
| <i>III Skilled manual</i>                                      | -0.19                    | -0.87, 0.50         | -0.12                    | -0.80, 0.56         | 1.53                     | 0.83, 2.23          | -0.07                    | -0.90, 0.76         |
| <i>IV Partly skilled/V Unskilled</i>                           | -0.55                    | -1.18, 0.07         | -0.45                    | -1.13, 0.22         | -0.11                    | -1.25, 1.04         | -1.23                    | -2.46, -0.01        |
| p-values (overall <sup>c</sup> ; test for trend <sup>d</sup> ) |                          | 0.01; -             |                          | 0.27; 0.18          |                          | <0.01; -            |                          | 0.03; -             |
| <b>Own highest qualification at age 46y</b>                    |                          |                     |                          |                     |                          |                     |                          |                     |
| <i>Degree and higher</i>                                       | 0.00 (ref)               | —                   | 0.00 (ref)               | —                   | 0.00 (ref)               | —                   | 0.00 (ref)               | —                   |
| <i>A-level and vocational qualification</i>                    | -0.73                    | -1.30, -0.17        | -0.79                    | -1.34, -0.25        | 1.58                     | 0.59, 2.56          | 1.14                     | 0.20, 2.08          |
| <i>GCSEs</i>                                                   | -0.49                    | -0.96, -0.02        | -0.29                    | -0.75, 0.18         | 1.75                     | 0.97, 2.52          | 0.85                     | 0.06, 1.65          |
| <i>No qualification</i>                                        | -0.82                    | -1.33, -0.32        | -0.56                    | -1.07, -0.04        | 1.97                     | 1.19, 2.75          | 1.18                     | 0.36, 2.00          |
| p-values (overall <sup>c</sup> ; test for trend <sup>d</sup> ) |                          | <0.01; <0.01        |                          | 0.02; -             |                          | <0.001; <0.001      |                          | 0.02; <0.01         |



---

Note 1: results are combined from analyses run across 50 imputed datasets.

Note 2: sample was restricted to those with valid measures of grip strength at age 46 years (including those 70 individuals unable for health reasons with imputed values).

Model 1: unadjusted (p-values from formal tests of sex interaction,  $p=0.03$  for father's occupational class at age 5y,  $p<0.01$  for mother's highest qualification at age 5y,  $p=0.01$  for father's highest qualification at age 5y,  $p<0.01$  for own occupational class at age 46y and  $p<0.001$  for own highest qualification at age 46y).

Model 4: adjusted for Model 3 + BMI at age 46y ( $\text{kg}/\text{m}^2$ ) + smoking status at age 42y, sedentary behaviour (TV watching) at age 42y, leisure-time physical activity (days/week) at age 42y and occupational activity at age 46y.

<sup>a</sup> Coefficient: Difference in mean grip strength (kg).

<sup>b</sup> CI: Confidence Interval.

<sup>c</sup> P-value: p-value from a likelihood ratio test of the overall association.

<sup>d</sup> P-trend: p-value not presented for relationship where there was significant deviation from linearity.
